# Supplementary material for: A novel long noncoding RNA linc00460 up-regulated by CBP/P300 promotes carcinogenesis in esophageal squamous cell carcinoma
Source: PubMed Central journal article supplement (PMC5964888; doi:10.1042/bsr20171019), 2017-10-17
Supplement: BSR20171019_Supp1.pdf [file BSR20171019_Supp1.pdf]

# Supplementary Figure S1

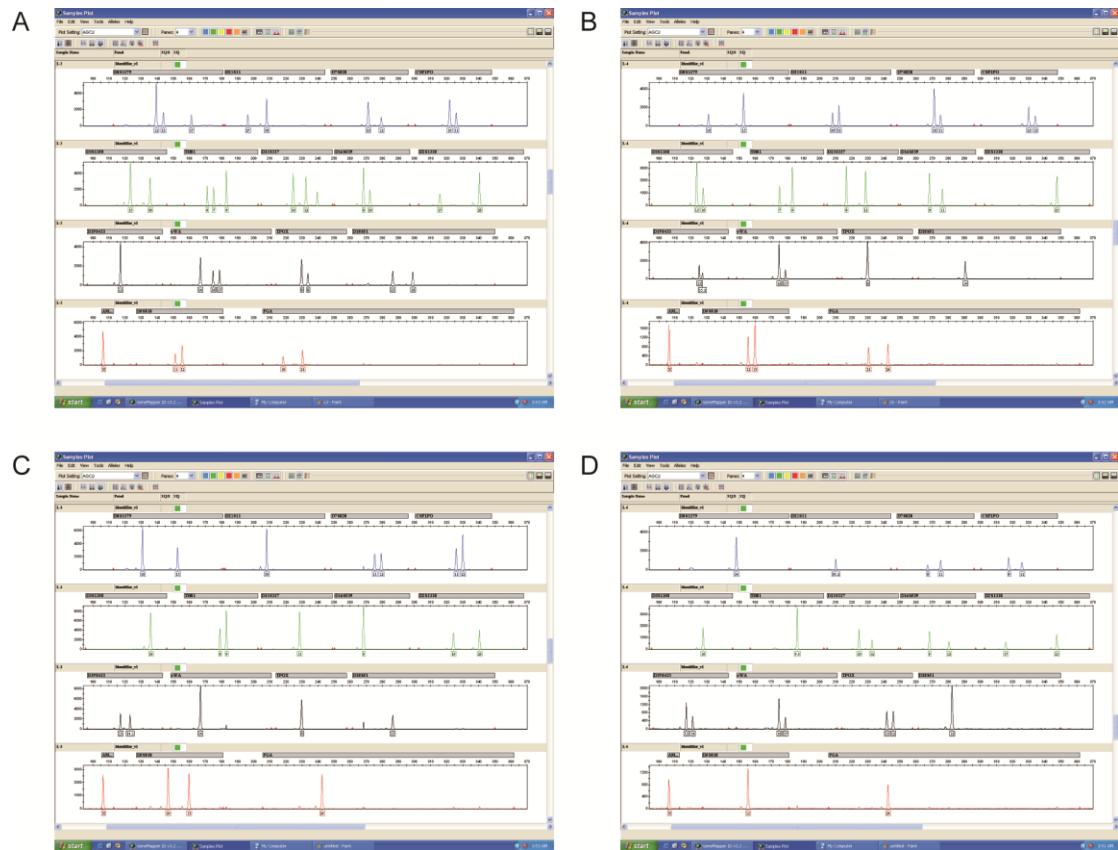

Figure S1: The results of cell line STR genotype. A, B, C, D represents for EC109, KYSE150, KYSE450 and Het-1A respectively.

Supplementary Figure S2

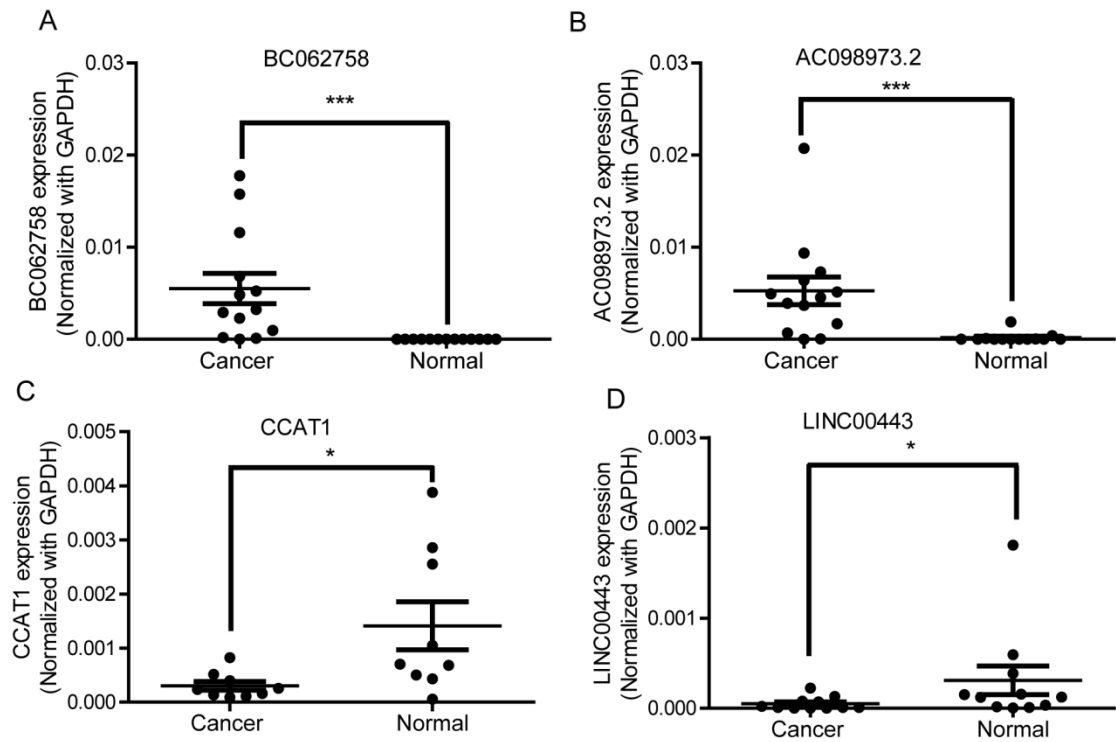

Figure S2: qRT-PCR confirmed the results of microarray. (A, B) LncRNA BC062758 and AC098973.2 were upregulated in ESCC tissues compared with normal tissues detected by microarray analysis and qRT-PCR; (C, D) LncRNA CCAT1 and LINC00443 were downregulated in ESCC tissues compared with normal tissues detected by microarray analysis and qRT-PCR.

Supplementary Figure S3

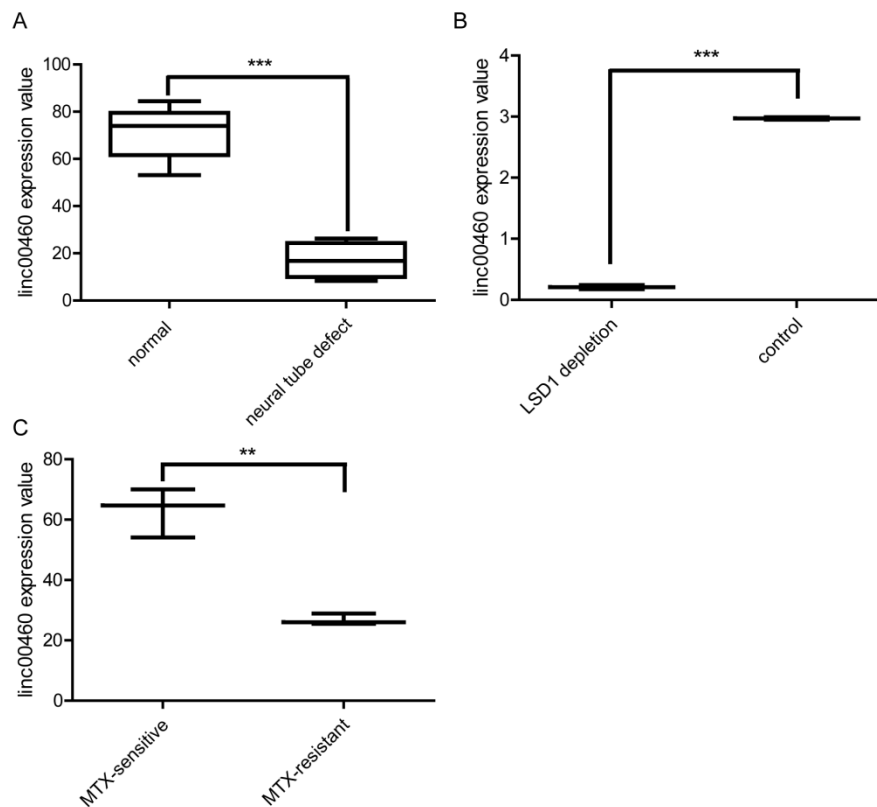

Figure S3. linc00460 expression in different status from GEO Profiles.

A.linc00460 expression is significantly lower in Neural tube defect patient than normal (GDS2470);

B.linc00460 expression is decreased when knockdown LSD1 in neuroblastoma cell lines (GDS5281);

C.MTX-sensitive HT29 colon adenocarcinoma cell line present higher linc00460 expression than MTX-resistant HT29 colon adenocarcinoma cell line (GDS3330).

Supplementary Figure S4

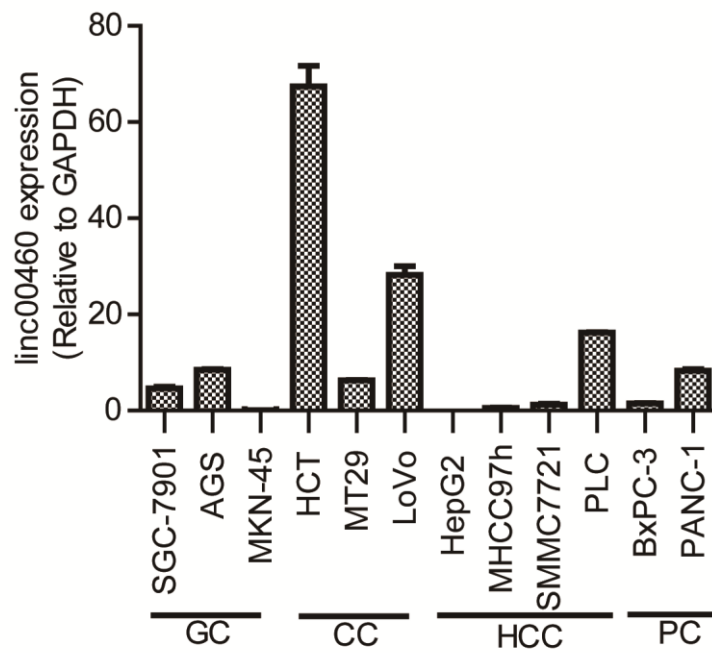

Figure S4: Linc00460 expression of some other cancer cell lines of digestive system detected by qRT-PCR.

GC: gastric cancer, including SGC-7901, AGS, MKN-45;

CC: colon cancer, including HCT, MT29, LoVo;

HCC: hepatocellular carcinoma, including HepG2, MHCC97h, SMMC7721, PLC;

PC: pancreatic cancer, including BxPC-3, PANC-1.

## Supplementary Table S1

Table S1: Sequences of qRT-PCR primers

| qRT-PCR primers  | Sequences 5'-3'       | PCR product length |
|------------------|-----------------------|--------------------|
| GAPDH-F          | GGGAGCCAAAAGGGTCATCA  | 203bp              |
| GAPDH-R          | TGATGGCATGGACTGTGGTC  |                    |
| Linc00460-F      | GGGGACCGAGACCTATGAGA  | 179bp              |
| Linc00460-R      | GAAAGCTGCAACATGCTCCC  |                    |
| CBP-F            | GTGCTGGCTGAGACCCTAAC  | 125bp              |
| CBP-R            | GGCTGTCCAAATGGACTTGT  |                    |
| P300-F           | CAATGAGATCCAAGGGGAGA  | 151bp              |
| P300-R           | ATGCATCTTTCTTCCGCACT  |                    |
| CHIP-qPCR primer | Sequences 5'-3'       | PCR product length |
| Linc00460-F      | GGGGACTCATCTCCTCAAACC | 74bp               |
| Linc00460-R      | CATGGCACTTCCGTCACCTC  |                    |

## Supplementary Table S2

Table S2: siRNA sequences

| linc00460 siRNAs | Sequences 5'-3'          | siRNA length |
|------------------|--------------------------|--------------|
| si-linc00460-1   | CUCCA GCCCU GUUAG AAAUTT | 21nt         |
| si-linc00460-2   | GGUAC CCAGA CAUUG UUAUTT | 21nt         |
| si-linc00460-3   | CCAGA UAAGU GCCCG AAUATT | 21nt         |
| CBP siRNAs       | Sequences 5'-3'          | siRNA length |
| si-CBP-1         | CGGCA CAGCC TCTCA GTCA   | 19nt         |
| si-CBP-2         | GGAGC CATCT AGTGC ATAA   | 19nt         |
| si-CBP-3         | GGAAC TAGAA CAAGA AGAA   | 19nt         |
| P300 siRNAs      | Sequences 5'-3'          | siRNA length |
| si-P300-1        | GCACG AACTA GGAAA GAAA   | 19nt         |
| si-P300-2        | CGACT TACCA GATGA ATTA   | 19nt         |
| si-P300-3        | GCACA AATGT CTAGT TCTT   | 19nt         |
